# Supplementary material for: Alpha oxygen – a unique oxidation active site from a quantum chemical viewpoint
Source: Royal Society of Chemistry journal article supplement (doi:10.1039/d5cs00496a), 2026-01-01
Supplement: d5cs00496a1.pdf [file d5cs00496a1.pdf]

## **Supplementary information**

### **The Alpha oxygen – the unique oxidation active site from the quantum chemical viewpoint**

Stepan Sklenak<sup>a</sup> and Jiri Dedeczek<sup>\*,a</sup>

*<sup>a</sup> J. Heyrovsky Institute of Physical Chemistry of the Czech Academy of Sciences, Dolejskova  
3, 18223 Prague, Czech Republic*

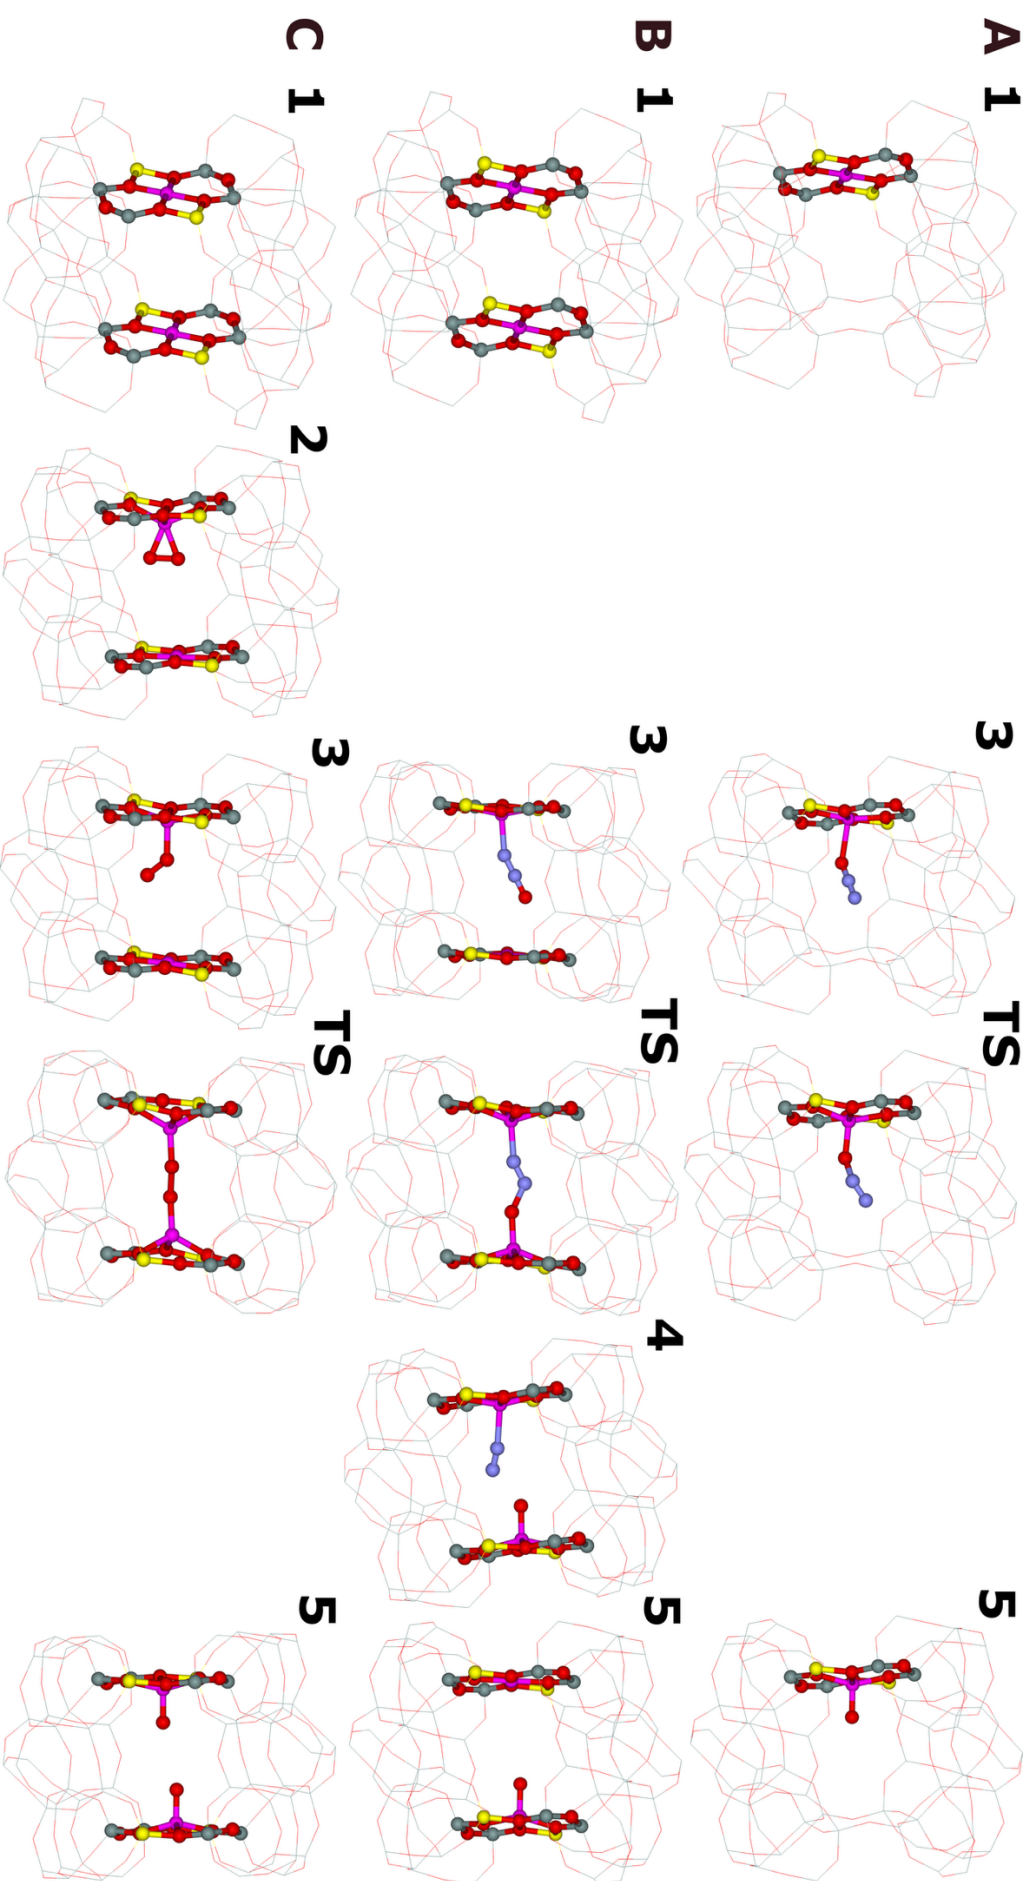

**Fig. S1** Optimized structures of all the species involved in the formation of the Alpha oxygen atoms. (A) from N<sub>2</sub>O over isolated Fe(II) cations. (B) from N<sub>2</sub>O over the distant binuclear Fe(II) cationic sites. (C) from O<sub>2</sub> over the distant binuclear Fe(II) cationic sites. All the Fe cationic sites are  $\beta 2$ . Silicon atoms are in gray, oxygen atoms in red, aluminum atoms in yellow, nitrogen atoms in blue, and iron atoms in violet.
